# Supplementary material
Source: PubMed Central journal article supplement (PMC3100668)
Supplement: NIHMS296890-supplement-SI.pdf [file NIHMS296890-supplement-SI.pdf]

# Addressing the stereochemistry of complex organic molecules by DFT-NMR: vannusal B in retrospective

## Supporting Information

*Giacomo Saielli,<sup>a</sup> K. C. Nicolaou,<sup>b,c</sup> Adrian Ortiz,<sup>b</sup> Hongjun Zhang<sup>b</sup> and Alessandro Bagno<sup>\*d</sup>*

<sup>a</sup>Istituto per la Tecnologia delle Membrane del CNR, Via Marzolo 1, 35131 Padova (Italy)

<sup>b</sup>Department of Chemistry and The Skaggs Institute for Chemical Biology, The Scripps Research Institute, 10550 North Torrey Pines Road, La Jolla, California 92037 (USA)

<sup>c</sup>Department of Chemistry and Biochemistry, University of California, San Diego, 9500 Gilman Drive, La Jolla, California 92093 (USA)

<sup>d</sup>Department of Chemistry, University of Padova, via Marzolo 1, 35131 Padova (Italy)

- 1. Complete refs. 21 and 22**
- 2. Tables of calculated (M06/pcS-2) and experimental <sup>13</sup>C chemical shifts**
- 3. Correlation graphs**
- 4. Cartesian coordinates**

## 1. Complete refs. 21 and 22

(21) Gaussian 03, Revision D.02, Frisch, M. J.; Trucks, G. W.; Schlegel, H. B.; Scuseria, G. E.; Robb, M. A.; Cheeseman, J. R.; Montgomery, Jr., J. A.; Vreven, T.; Kudin, K. N.; Burant, J. C.; Millam, J. M.; Iyengar, S. S.; Tomasi, J.; Barone, V.; Mennucci, B.; Cossi, M.; Scalmani, G.; Rega, N.; Petersson, G. A.; Nakatsuji, H.; Hada, M.; Ehara, M.; Toyota, K.; Fukuda, R.; Hasegawa, J.; Ishida, M.; Nakajima, T.; Honda, Y.; Kitao, O.; Nakai, H.; Klene, M.; Li, X.; Knox, J. E.; Hratchian, H. P.; Cross, J. B.; Bakken, V.; Adamo, C.; Jaramillo, J.; Gomperts, R.; Stratmann, R. E.; Yazyev, O.; Austin, A. J.; Cammi, R.; Pomelli, C.; Ochterski, J. W.; Ayala, P. Y.; Morokuma, K.; Voth, G. A.; Salvador, P.; Dannenberg, J. J.; Zakrzewski, V. G.; Dapprich, S.; Daniels, A. D.; Strain, M. C.; Farkas, O.; Malick, D. K.; Rabuck, A. D.; Raghavachari, K.; Foresman, J. B.; Ortiz, J. V.; Cui, Q.; Baboul, A. G.; Clifford, S.; Cioslowski, J.; Stefanov, B. B.; Liu, G.; Liashenko, A.; Piskorz, P.; Komaromi, I.; Martin, R. L.; Fox, D. J.; Keith, T.; Al-Laham, M. A.; Peng, C. Y.; Nanayakkara, A.; Challacombe, M.; Gill, P. M. W.; Johnson, B.; Chen, W.; Wong, M. W.; Gonzalez, C.; and Pople, J. A.; Gaussian, Inc., Wallingford CT, 2004.

(22) Gaussian 09, Revision B.01, Frisch, M. J.; Trucks, G. W.; Schlegel, H. B.; Scuseria, G. E.; Robb, M. A.; Cheeseman, J. R.; Scalmani, G.; Barone, V.; Mennucci, B.; Petersson, G. A.; Nakatsuji, H.; Caricato, M.; Li, X.; Hratchian, H. P.; Izmaylov, A. F.; Bloino, J.; Zheng, G.; Sonnenberg, J. L.; Hada, M.; Ehara, M.; Toyota, K.; Fukuda, R.; Hasegawa, J.; Ishida, M.; Nakajima, T.; Honda, Y.; Kitao, O.; Nakai, H.; Vreven, T.; Montgomery, Jr., J. A.; Peralta, J. E.; Ogliaro, F.; Bearpark, M.; Heyd, J. J.; Brothers, E.; Kudin, K. N.; Staroverov, V. N.; Kobayashi, R.; Normand, J.; Raghavachari, K.; Rendell, A.; Burant, J. C.; Iyengar, S. S.; Tomasi, J.; Cossi, M.; Rega, N.; Millam, N. J.; Klene, M.; Knox, J. E.; Cross, J. B.; Bakken, V.; Adamo, C.; Jaramillo, J.; Gomperts, R.; Stratmann, R. E.; Yazyev, O.; Austin, A. J.; Cammi, R.; Pomelli, C.; Ochterski, J. W.; Martin, R. L.; Morokuma, K.; Zakrzewski, V. G.; Voth, G. A.; Salvador, P.; Dannenberg, J. J.; Dapprich, S.; Daniels, A. D.; Farkas, Ö.; Foresman, J. B.; Ortiz, J. V.; Cioslowski, J.; Fox, D. J. Gaussian, Inc., Wallingford CT, 2009.

**2. Tables of calculated (M06/pcS-2) and experimental  $^{13}\text{C}$  chemical shifts for the compounds of Figure 1**

**2-1**

| C  | $\delta_{\text{exp}}$ | $\delta_{\text{calc}}$ |
|----|-----------------------|------------------------|
| 32 | 20.917                | 23.6608                |
| 16 | 22.086                | 26.4435                |
| 20 | 21.832                | 27.1022                |
| 30 | 24.017                | 27.3425                |
| 15 | 25.017                | 28.2598                |
| 24 | 28.947                | 30.2931                |
| 5  | 28.972                | 30.5968                |
| 4  | 26.756                | 33.2572                |
| 9  | 31.436                | 34.5286                |
| 8  | 31.04                 | 34.6104                |
| 23 | 30.014                | 34.8918                |
| 19 | 37.242                | 40.676                 |
| 7  | 45.358                | 50.6556                |
| 21 | 50.975                | 52.573                 |
| 6  | 48.229                | 53.3483                |
| 3  | 52.214                | 56.0976                |
| 18 | 56.581                | 59.0668                |
| 10 | 52.823                | 61.399                 |
| 17 | 51.868                | 61.936                 |
| 14 | 57.735                | 64.7792                |
| 13 | 69.472                | 78.0019                |
| 28 | 73.198                | 78.9325                |
| 29 | 78.515                | 82.3969                |
| 22 | 73.395                | 84.0094                |
| 26 | 76.792                | 86.136                 |
| 25 | 79.005                | 91.6937                |
| 1  | 111.513               | 123.843                |
| 12 | 113.759               | 125.595                |
| 2  | 144.688               | 162.454                |
| 11 | 158.199               | 184.619                |
| 31 | 172.152               | 188.179                |
| 27 | 198.918               | 217.73                 |

**2-2**

| C  | $\delta_{\text{exp}}$ | $\delta_{\text{calc}}$ |
|----|-----------------------|------------------------|
| 32 | 20.952                | 23.5019                |
| 16 | 21.633                | 26.0016                |
| 30 | 24.008                | 26.3849                |
| 15 | 24.236                | 28.2586                |
| 20 | 22.049                | 29.2304                |
| 4  | 26.636                | 29.3307                |
| 24 | 28.969                | 31.8074                |
| 23 | 30.029                | 33.3004                |
| 5  | 28.999                | 33.5597                |
| 9  | 33.706                | 36.0127                |
| 8  | 31.018                | 36.5782                |
| 19 | 37.127                | 44.3612                |
| 7  | 45.28                 | 48.6624                |
| 6  | 50.65                 | 55.2369                |
| 3  | 52.124                | 56.6108                |
| 21 | 51.00                 | 57.5673                |
| 10 | 52.429                | 60.4519                |
| 18 | 56.542                | 60.5397                |
| 17 | 51.496                | 61.5135                |
| 14 | 57.326                | 62.9301                |
| 13 | 68.864                | 76.6904                |
| 22 | 73.274                | 78.0103                |
| 28 | 71.121                | 78.7182                |
| 29 | 78.03                 | 82.0264                |
| 25 | 79.015                | 93.8086                |
| 26 | 76.72                 | 93.9079                |
| 1  | 111.467               | 124.528                |
| 12 | 114.319               | 126.534                |
| 2  | 144.748               | 162.59                 |
| 11 | 157.541               | 184.743                |
| 31 | 172.052               | 188.45                 |
| 27 | 200.249               | 218.464                |

**3-1**

| C  | $\delta_{\text{exp}}$ | $\delta_{\text{calc}}$ |
|----|-----------------------|------------------------|
| 24 | 27.482                | 24.7434                |
| 20 | 23.356                | 25.0578                |
| 32 | 20.919                | 25.2158                |
| 16 | 23.139                | 26.332                 |
| 30 | 24.019                | 27.7165                |
| 15 | 25.316                | 28.8016                |
| 5  | 28.987                | 31.0378                |
| 4  | 26.75                 | 32.9958                |
| 23 | 28.079                | 33.1082                |
| 8  | 31.052                | 34.986                 |
| 9  | 31.435                | 35.2871                |
| 19 | 40.311                | 47.9452                |
| 7  | 45.285                | 50.1819                |
| 6  | 48.295                | 53.1089                |
| 18 | 53.357                | 54.041                 |
| 3  | 52.093                | 56.9039                |
| 21 | 57.181                | 58.6066                |
| 10 | 53.049                | 60.1298                |
| 14 | 58.572                | 63.9853                |
| 17 | 55.127                | 65.5417                |
| 13 | 70.641                | 77.8206                |
| 22 | 73.326                | 78.9755                |
| 28 | 73.345                | 81.4635                |
| 29 | 78.561                | 82.4491                |
| 25 | 83.024                | 92.9225                |
| 26 | 81.468                | 95.4221                |
| 1  | 111.49                | 124.996                |
| 12 | 113.772               | 125.779                |
| 2  | 144.724               | 161.872                |
| 11 | 157.992               | 184.282                |
| 31 | 172.159               | 188.296                |
| 27 | 200.354               | 216.102                |

**3-2**

| C  | $\delta_{\text{exp}}$ | $\delta_{\text{calc}}$ |
|----|-----------------------|------------------------|
| 32 | 20.954                | 23.177                 |
| 20 | 22.876                | 23.229                 |
| 16 | 23.355                | 28.4897                |
| 30 | 24.003                | 26.4486                |
| 15 | 24.512                | 27.4305                |
| 4  | 26.634                | 28.8649                |
| 24 | 27.47                 | 30.5584                |
| 5  | 28.996                | 33.7531                |
| 23 | 28.996                | 25.4463                |
| 8  | 30.988                | 36.2956                |
| 9  | 33.69                 | 36.5219                |
| 19 | 40.403                | 40.5353                |
| 7  | 45.216                | 49.2272                |
| 6  | 50.72                 | 55.3799                |
| 3  | 52.132                | 56.9781                |
| 10 | 52.607                | 60.2593                |
| 18 | 53.364                | 59.755                 |
| 17 | 54.736                | 60.9591                |
| 21 | 57.189                | 53.9065                |
| 14 | 58.22                 | 63.0944                |
| 13 | 70.047                | 76.2812                |
| 28 | 71.261                | 78.1707                |
| 22 | 73.345                | 81.5771                |
| 29 | 78.056                | 81.912                 |
| 26 | 81.452                | 86.0982                |
| 25 | 82.975                | 90.9876                |
| 1  | 111.458               | 124.516                |
| 12 | 114.329               | 125.976                |
| 2  | 144.771               | 162.6                  |
| 11 | 157.472               | 184.949                |
| 31 | 172.115               | 188.803                |
| 27 | 201.585               | 217.869                |

**4-1**

| C  | $\delta_{\text{exp}}$ | $\delta_{\text{calc}}$ |
|----|-----------------------|------------------------|
| 24 | 29.625                | 22.9293                |
| 32 | 20.919                | 24.8608                |
| 30 | 24.016                | 27.2539                |
| 16 | 24.334                | 27.5192                |
| 20 | 23.225                | 28.3765                |
| 15 | 24.987                | 29.1228                |
| 4  | 26.741                | 31.6626                |
| 5  | 28.965                | 31.835                 |
| 8  | 31.038                | 35.0419                |
| 9  | 31.434                | 35.4198                |
| 23 | 29.927                | 36.2929                |
| 19 | 40.227                | 41.3459                |
| 7  | 45.219                | 49.0544                |
| 6  | 48.271                | 52.5882                |
| 3  | 52.097                | 56.8304                |
| 21 | 51.812                | 56.8685                |
| 17 | 52.582                | 59.2358                |
| 10 | 53.107                | 60.0732                |
| 18 | 58.578                | 62.8759                |
| 14 | 58.96                 | 63.3839                |
| 13 | 69.246                | 76.4332                |
| 28 | 73.262                | 81.4131                |
| 29 | 78.561                | 82.4611                |
| 26 | 77.643                | 83.5851                |
| 25 | 78.157                | 86.2246                |
| 22 | 73.599                | 86.3226                |
| 1  | 111.489               | 125.171                |
| 12 | 114.284               | 127.29                 |
| 2  | 144.725               | 161.829                |
| 11 | 157.703               | 183.219                |
| 31 | 172.177               | 187.994                |
| 27 | 200.979               | 217.493                |

**4-2**

| C  | $\delta_{\text{exp}}$ | $\delta_{\text{calc}}$ |
|----|-----------------------|------------------------|
| 32 | 20.965                | 22.2274                |
| 24 | 29.643                | 23.5378                |
| 30 | 24.016                | 26.3629                |
| 20 | 23.225                | 26.697                 |
| 16 | 24.048                | 26.7542                |
| 15 | 24.232                | 27.8293                |
| 4  | 26.632                | 28.8663                |
| 5  | 28.995                | 33.156                 |
| 8  | 31.009                | 36.4062                |
| 23 | 29.941                | 36.8024                |
| 9  | 33.683                | 37.1631                |
| 19 | 40.315                | 45.1187                |
| 7  | 45.18                 | 49.6993                |
| 6  | 50.723                | 55.7333                |
| 3  | 52.126                | 56.7232                |
| 10 | 52.639                | 59.7373                |
| 17 | 52.214                | 60.7131                |
| 21 | 51.778                | 61.7451                |
| 18 | 58.211                | 62.8227                |
| 14 | 58.914                | 63.313                 |
| 13 | 68.627                | 75.1909                |
| 28 | 71.224                | 78.311                 |
| 29 | 78.141                | 81.9541                |
| 22 | 73.572                | 83.2847                |
| 25 | 78.042                | 85.5891                |
| 26 | 77.625                | 87.608                 |
| 1  | 111.459               | 124.531                |
| 12 | 114.787               | 126.915                |
| 2  | 144.753               | 162.627                |
| 11 | 157.206               | 183.912                |
| 31 | 172.075               | 189.465                |
| 27 | 202.091               | 219.232                |

**5-1**

| C  | $\delta_{\text{exp}}$ | $\delta_{\text{calc}}$ |
|----|-----------------------|------------------------|
| 32 | 20.917                | 24.9927                |
| 20 | 24.489                | 26.9322                |
| 16 | 23.536                | 26.9628                |
| 30 | 24.017                | 27.4325                |
| 15 | 25.085                | 27.5552                |
| 5  | 28.95                 | 30.821                 |
| 24 | 29.408                | 31.6969                |
| 4  | 26.74                 | 32.6228                |
| 23 | 29.888                | 33.3669                |
| 9  | 31.432                | 34.6399                |
| 8  | 31.021                | 34.8304                |
| 19 | 38.886                | 43.5317                |
| 7  | 45.209                | 50.3993                |
| 6  | 48.254                | 53.2853                |
| 3  | 52.075                | 56.0424                |
| 17 | 51.754                | 59.2098                |
| 10 | 53.174                | 61.7466                |
| 18 | 58.195                | 64.1876                |
| 14 | 58.588                | 64.6448                |
| 21 | 62.495                | 68.1201                |
| 13 | 69.426                | 77.2086                |
| 28 | 73.087                | 79.3946                |
| 22 | 72.162                | 81.4322                |
| 26 | 76.848                | 81.4369                |
| 25 | 75.969                | 82.231                 |
| 29 | 78.553                | 82.5902                |
| 1  | 111.491               | 124.474                |
| 12 | 114.195               | 126.367                |
| 2  | 144.733               | 162.36                 |
| 11 | 157.884               | 183.909                |
| 31 | 172.161               | 188.451                |
| 27 | 200.765               | 217.928                |

**5-2**

| C  | $\delta_{\text{exp}}$ | $\delta_{\text{calc}}$ |
|----|-----------------------|------------------------|
| 32 | 20.951                | 23.5491                |
| 16 | 23.245                | 25.9001                |
| 30 | 24.014                | 25.9463                |
| 20 | 24.371                | 26.3789                |
| 15 | 24.494                | 28.4143                |
| 24 | 29.414                | 29.4743                |
| 23 | 29.884                | 30.3499                |
| 4  | 26.63                 | 30.4449                |
| 5  | 28.995                | 32.3715                |
| 9  | 33.659                | 36.2941                |
| 8  | 31.014                | 36.587                 |
| 19 | 39.041                | 41.913                 |
| 7  | 45.219                | 48.3366                |
| 6  | 50.74                 | 55.481                 |
| 3  | 52.125                | 56.1384                |
| 17 | 51.443                | 58.4137                |
| 10 | 52.668                | 60.2379                |
| 18 | 57.879                | 62.7218                |
| 14 | 58.573                | 63.3384                |
| 21 | 62.517                | 69.5276                |
| 13 | 68.843                | 75.6095                |
| 22 | 72.17                 | 77.7301                |
| 28 | 71.168                | 78.6153                |
| 29 | 78.071                | 82.329                 |
| 25 | 75.694                | 83.1121                |
| 26 | 76.911                | 86.0899                |
| 1  | 111.443               | 124.086                |
| 12 | 114.762               | 127.202                |
| 2  | 144.785               | 162.577                |
| 11 | 157.397               | 183.793                |
| 31 | 172.106               | 188.044                |
| 27 | 201.91                | 218.775                |

### 3. Correlation graphs

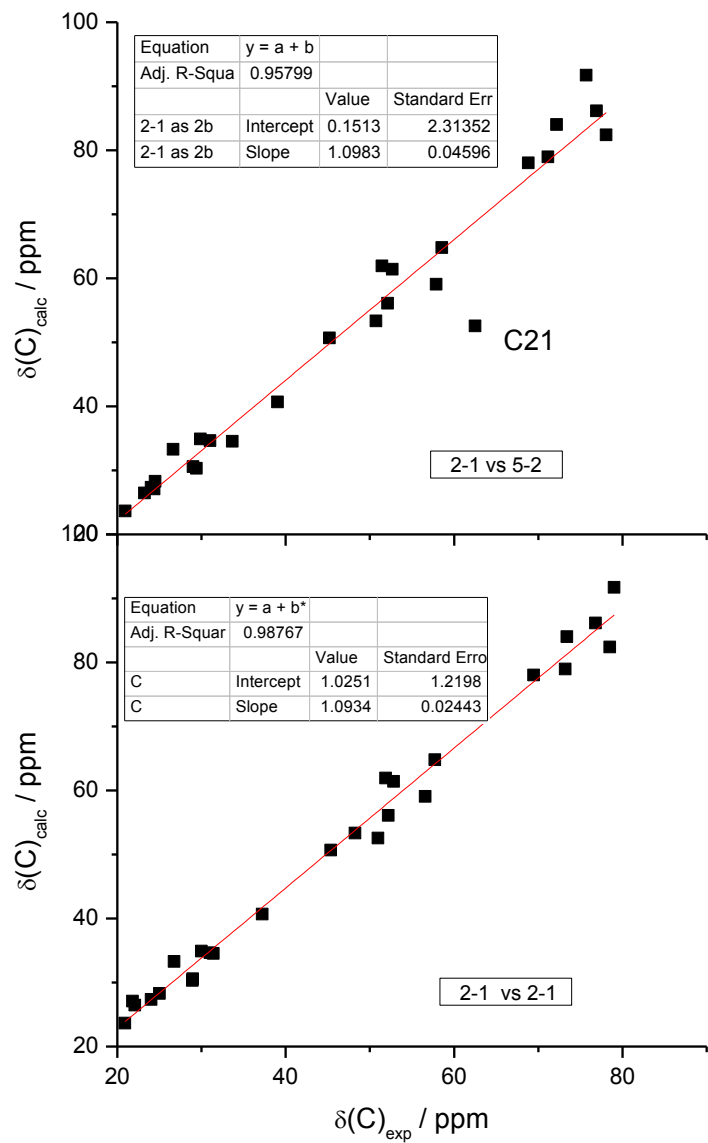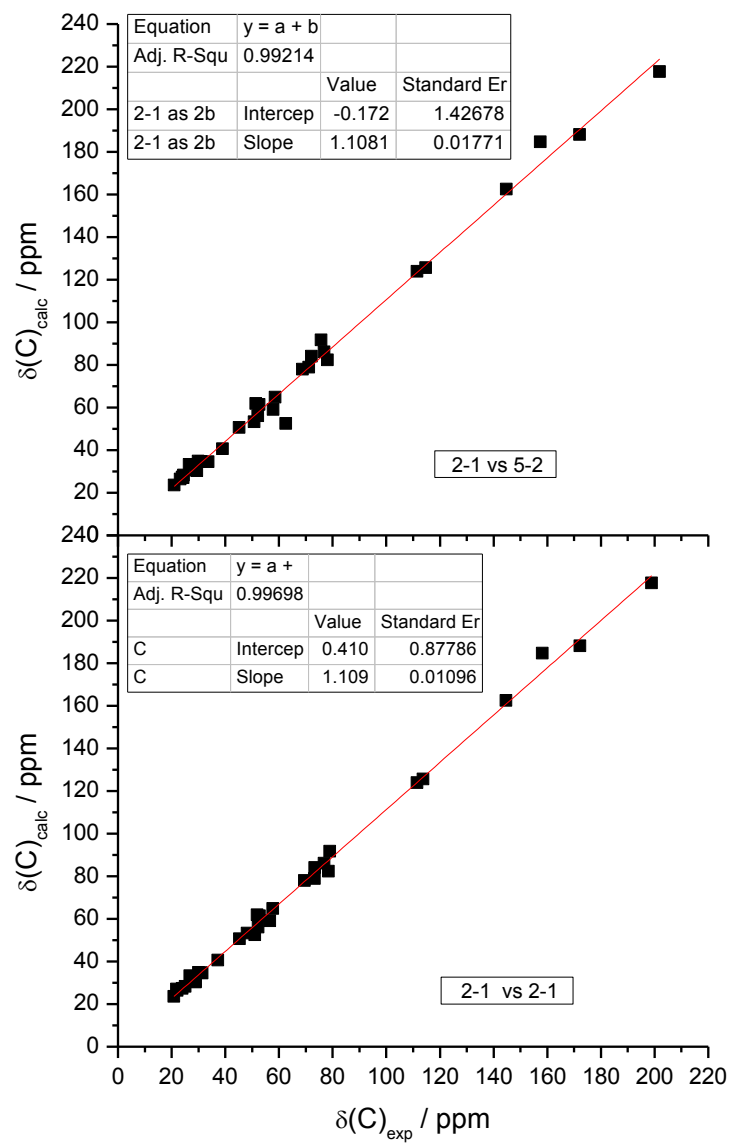

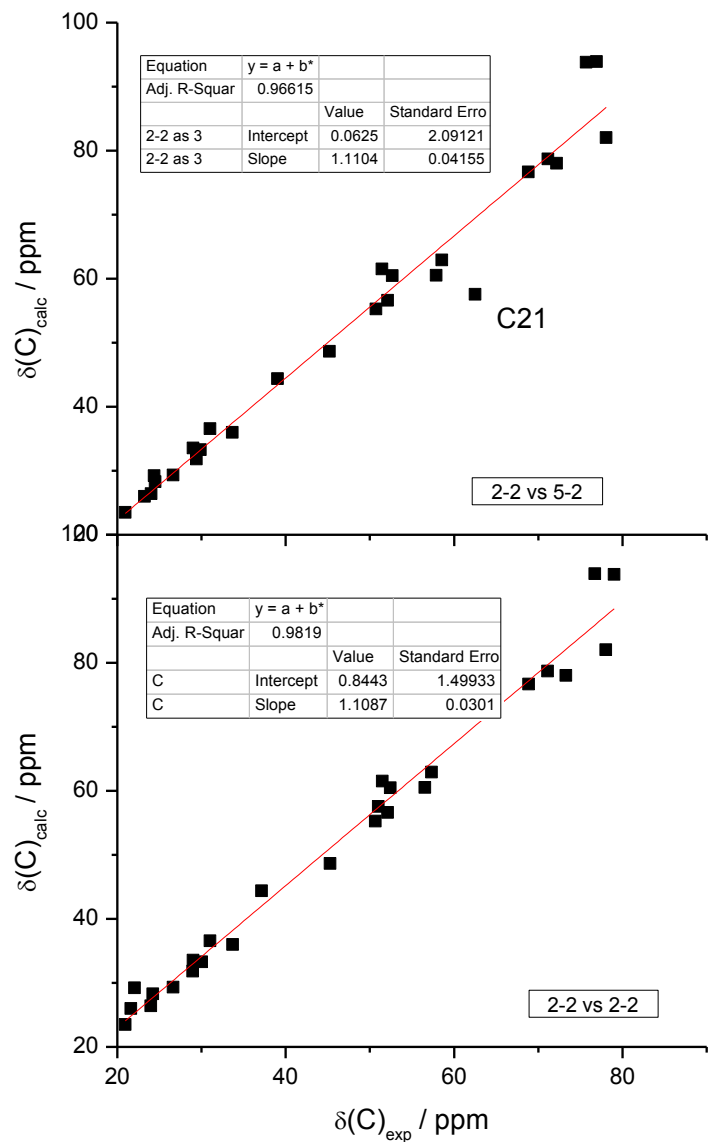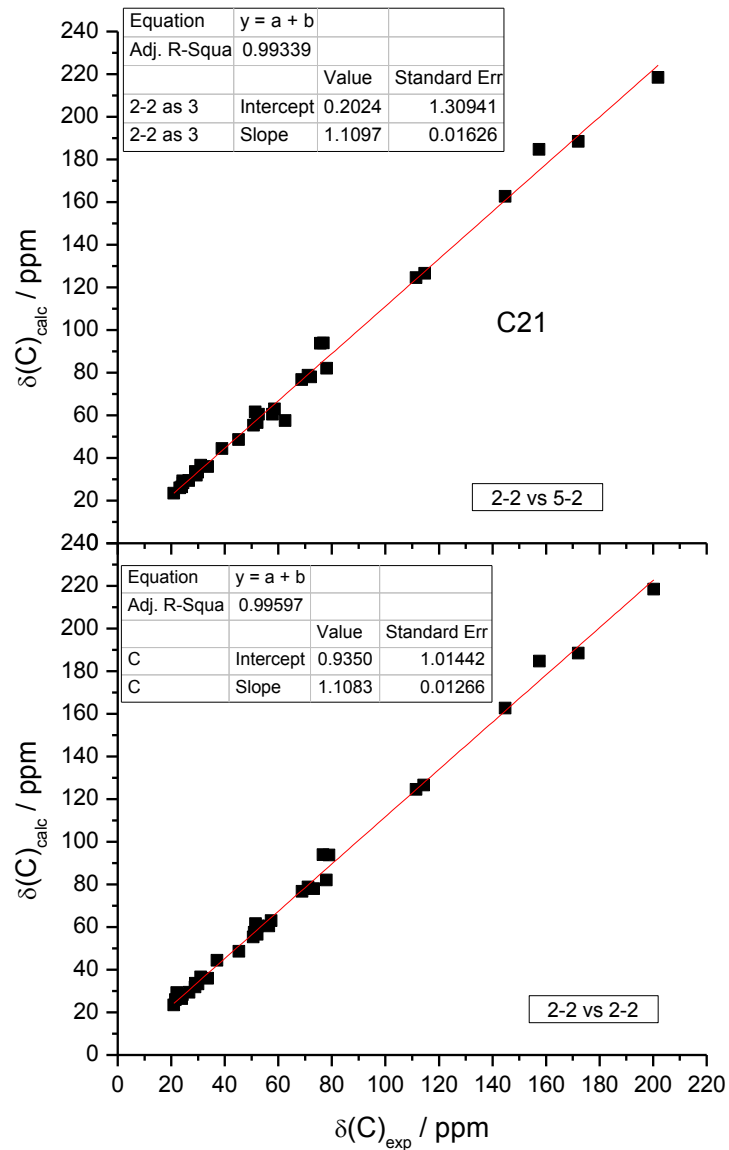

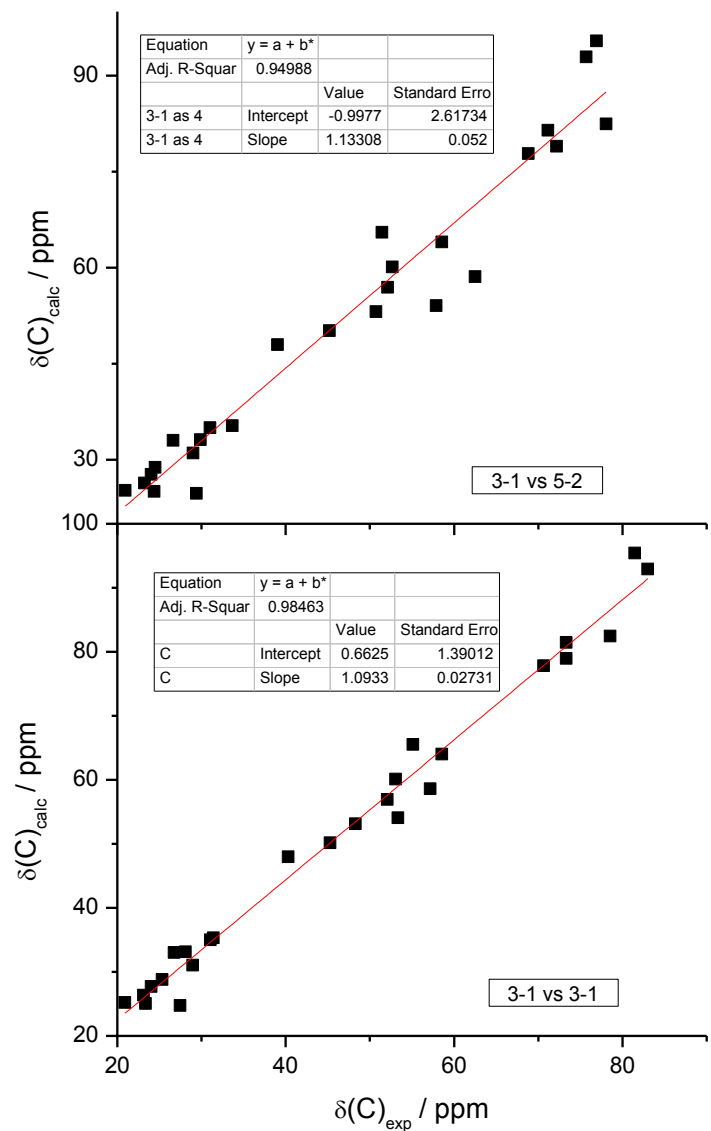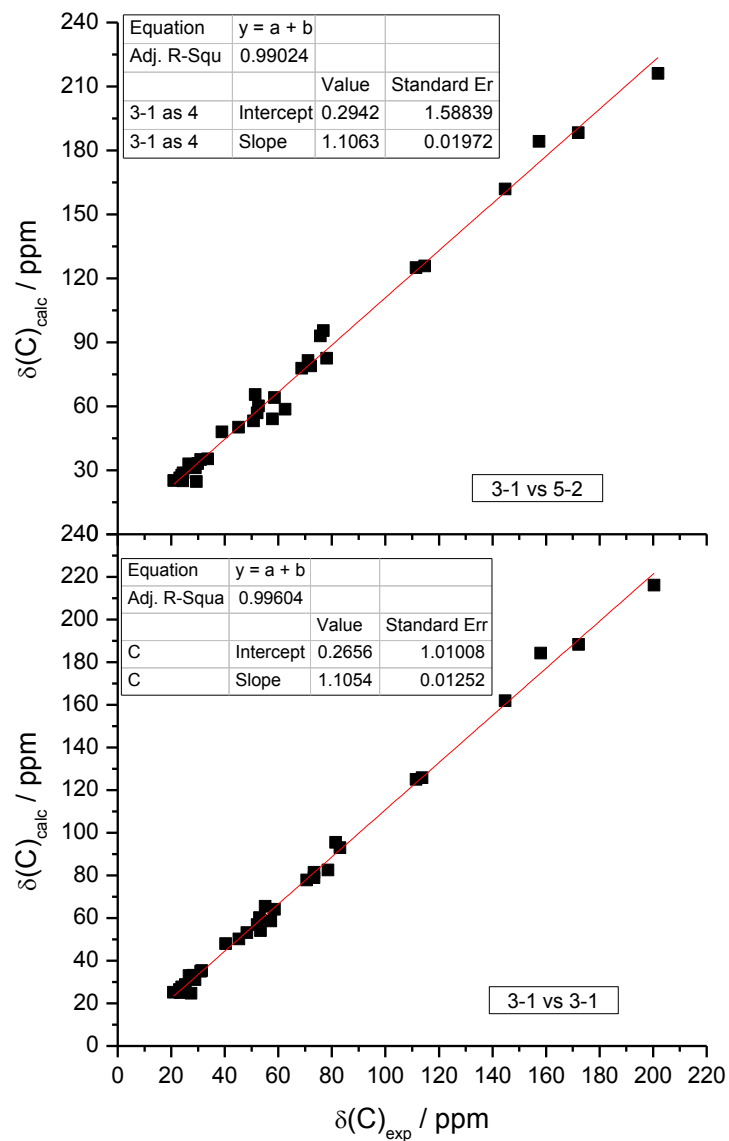



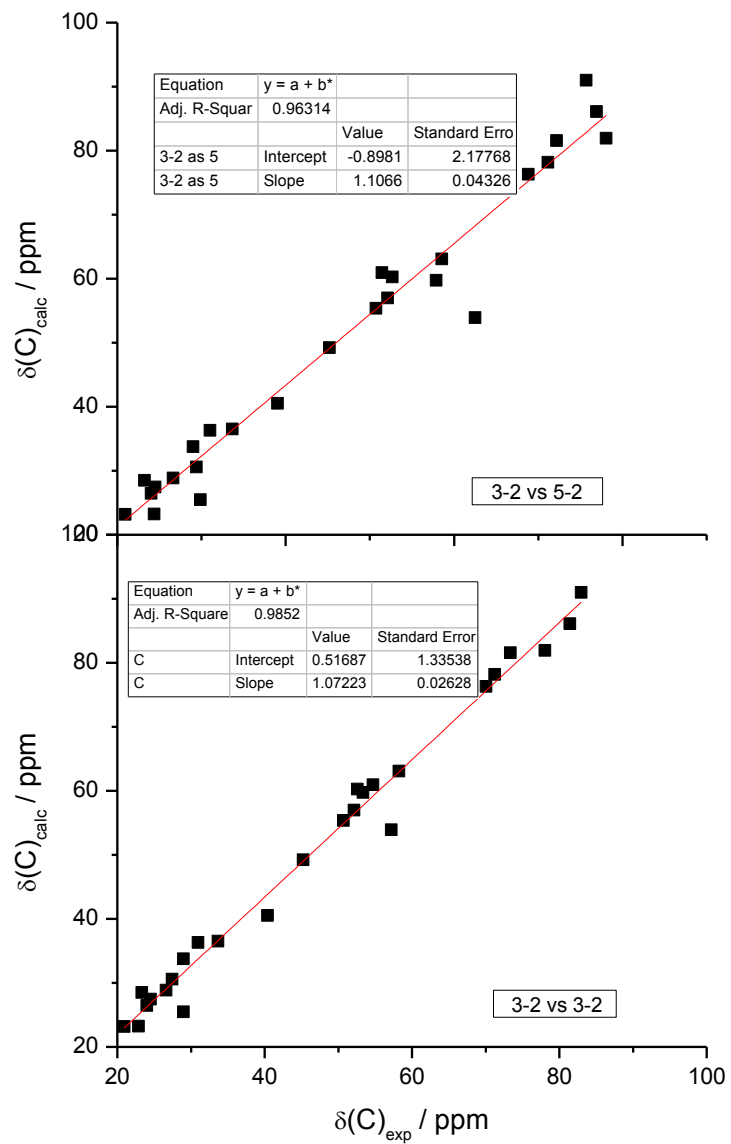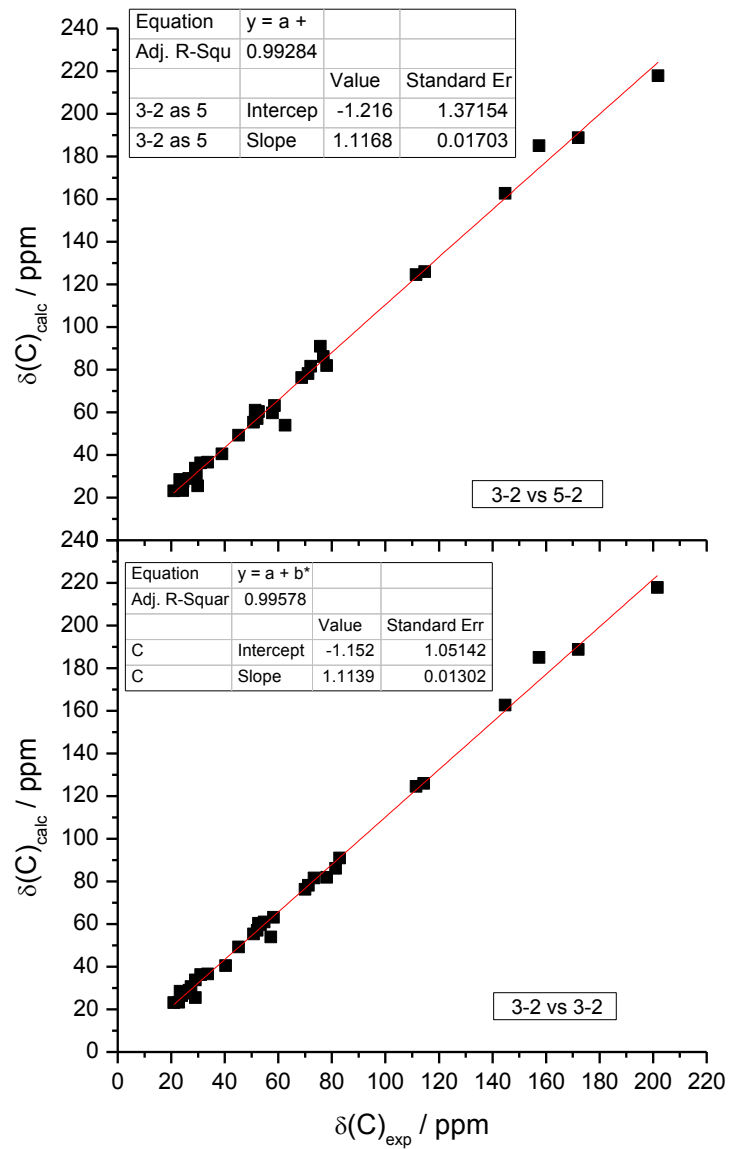

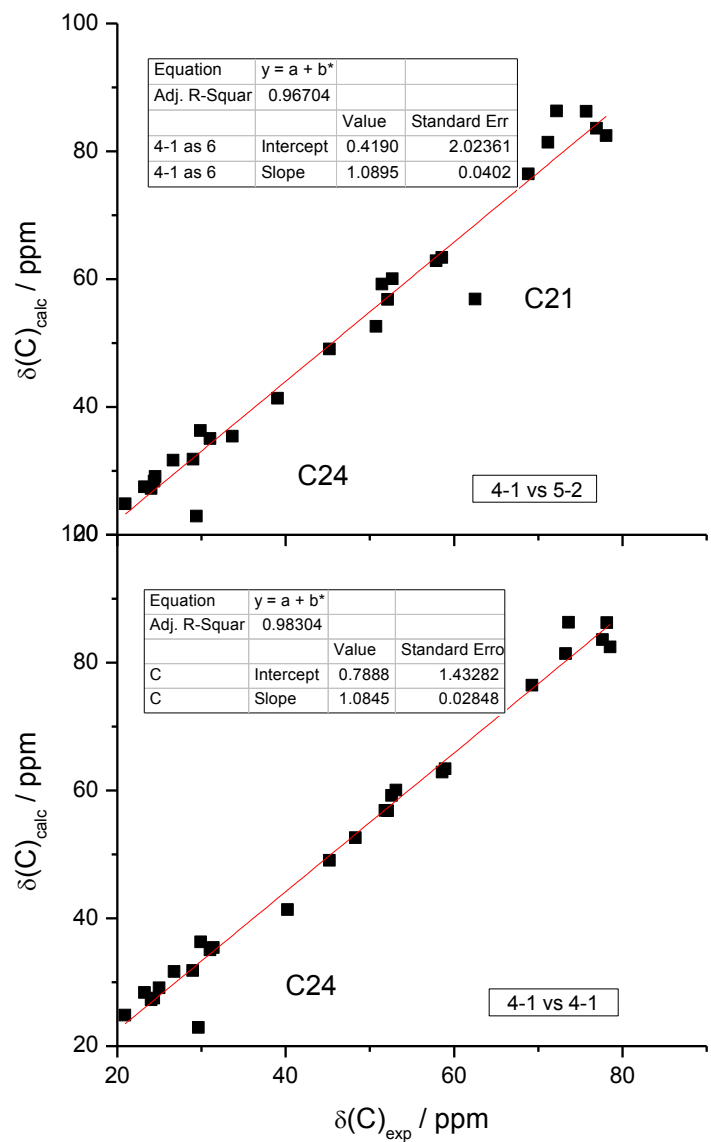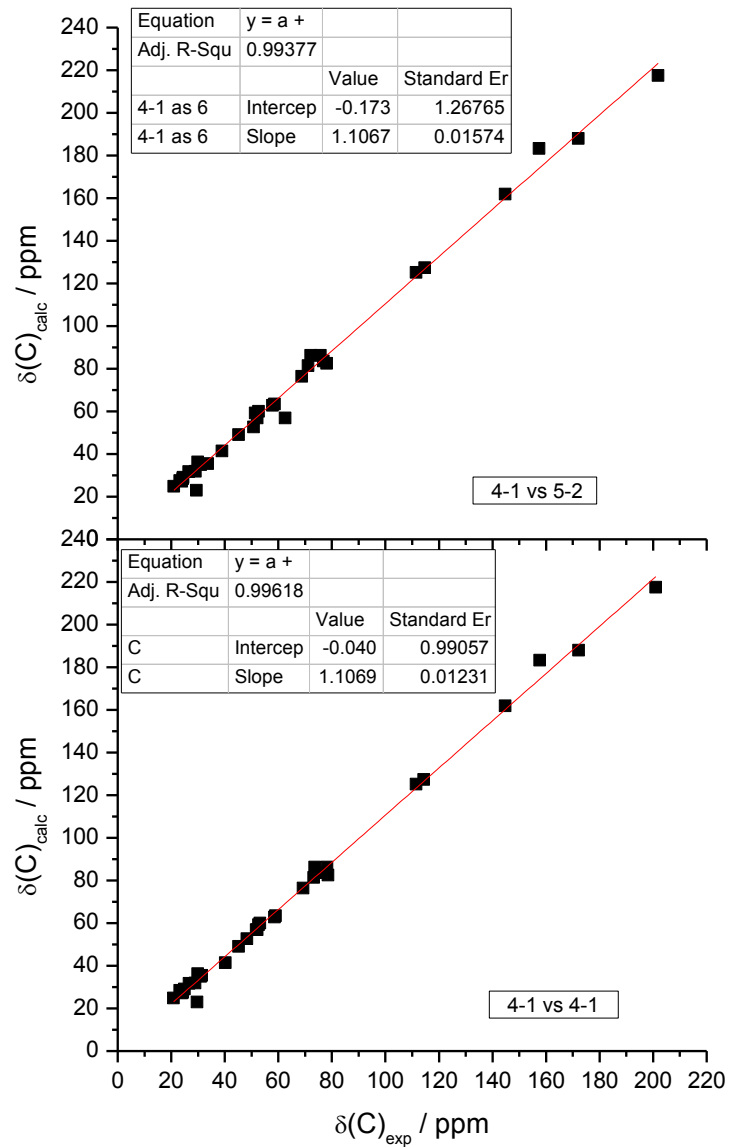

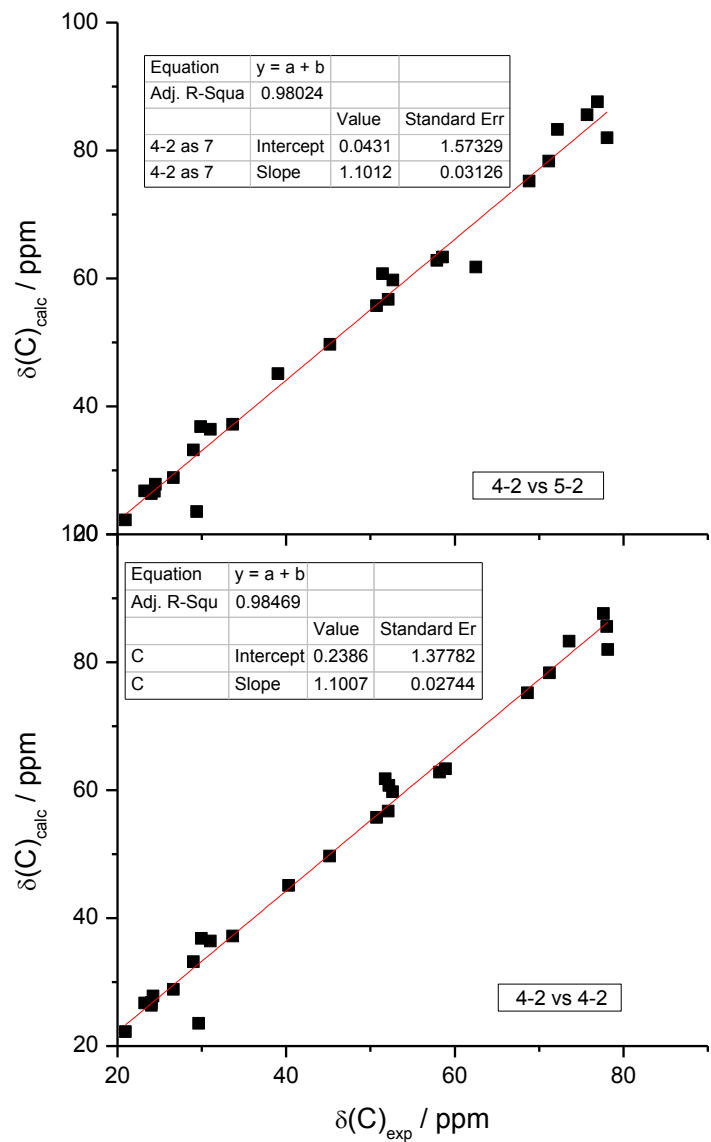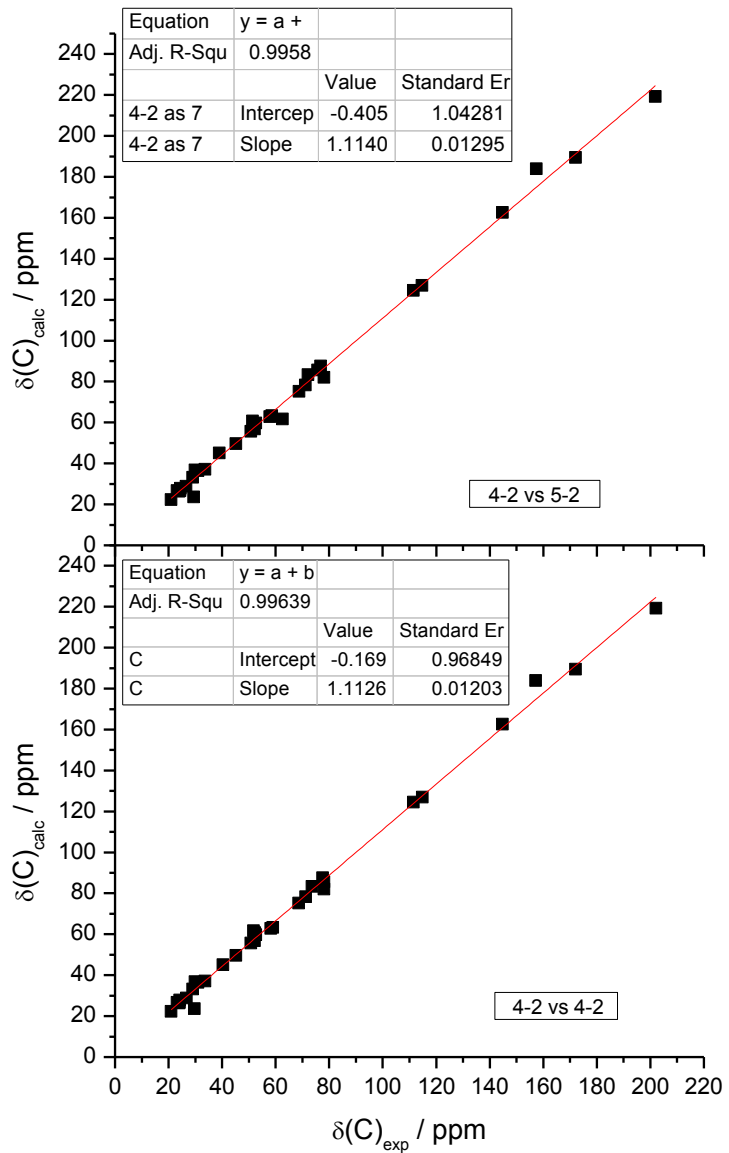

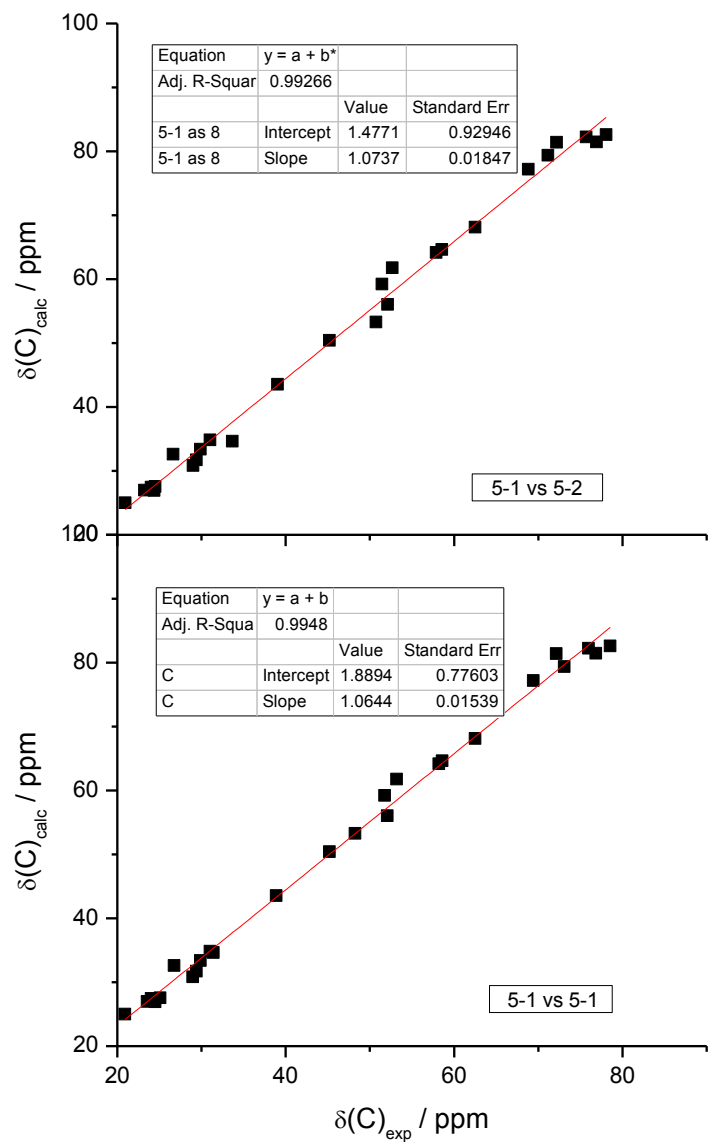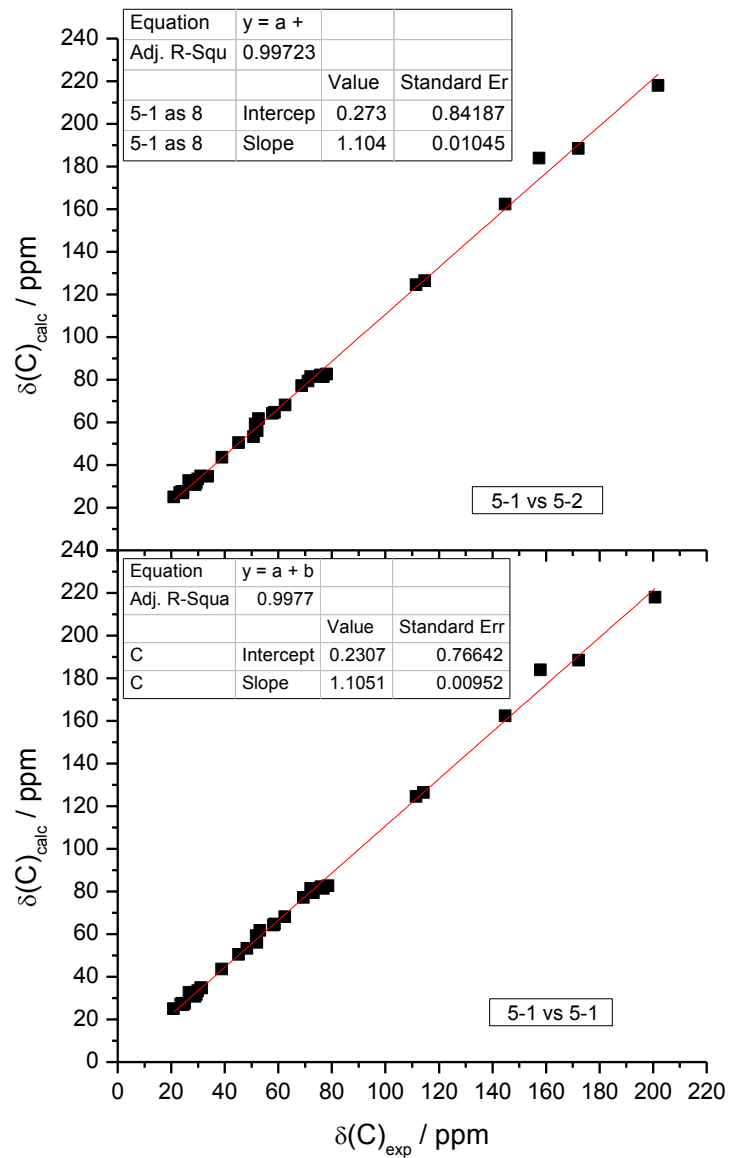

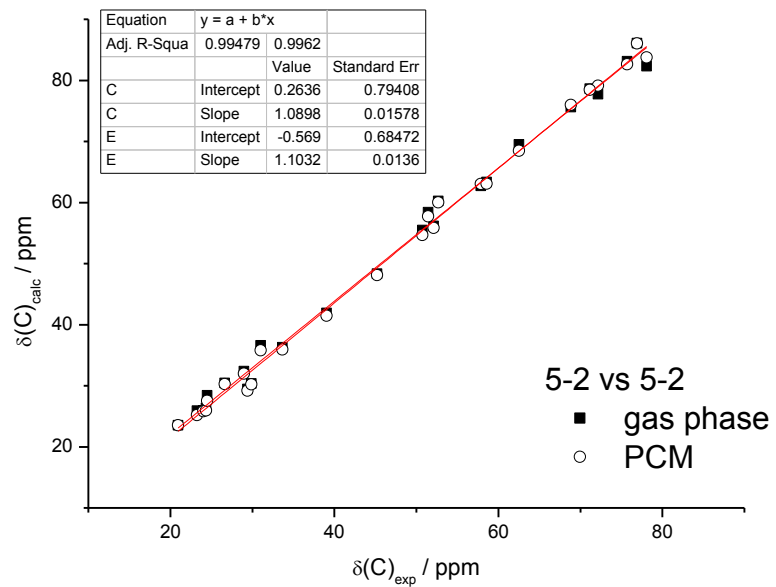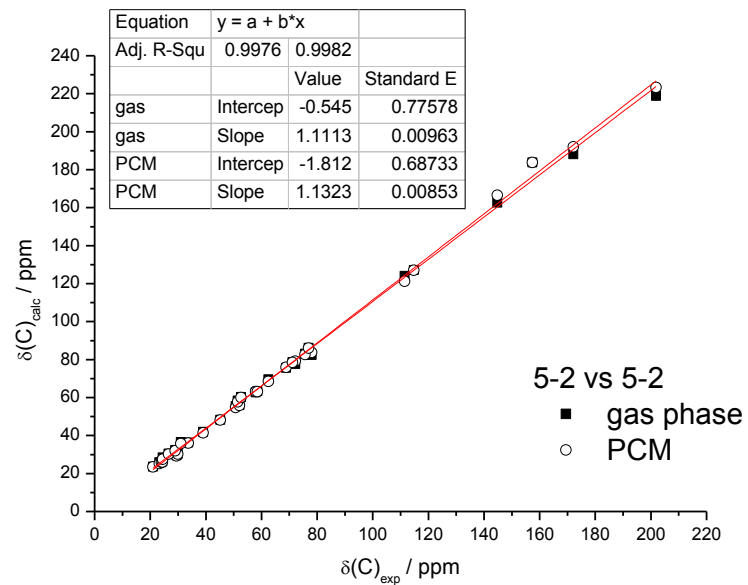

#### 4. Cartesian coordinates and SCF energy in hartrees (B3LYP/6-31G\*\*)

##### 2-1 (E = -1773.687646)

|   |           |           |           |
|---|-----------|-----------|-----------|
| C | 4.806831  | 0.383485  | -0.457304 |
| C | 3.291633  | 0.293500  | -0.175979 |
| C | 3.063659  | 1.376635  | 0.918766  |
| C | 4.273242  | 2.347081  | 0.835734  |
| C | 5.070375  | 1.898047  | -0.417159 |
| C | 2.753936  | -1.118508 | 0.166405  |
| C | 1.225256  | -1.149654 | 0.263664  |
| C | 0.656180  | -2.010899 | -0.858122 |
| C | 1.817258  | -2.129573 | -1.858743 |
| C | 3.049591  | -2.171440 | -0.940820 |
| C | -0.758165 | -1.645088 | -1.419680 |
| C | -1.448130 | -0.594475 | -0.524521 |
| C | -1.076340 | -0.663301 | 0.987901  |
| C | 0.432646  | -0.561329 | 1.172050  |
| C | -2.995472 | -0.622851 | -0.468774 |
| C | -3.340959 | 0.206781  | 0.849397  |
| C | -1.920450 | 0.588942  | 1.374039  |
| C | -4.316971 | 1.417185  | 0.644877  |
| C | -5.793908 | 0.850655  | 0.832804  |
| C | -5.588791 | -0.599772 | 1.331314  |
| C | -4.150014 | -0.643333 | 1.856026  |
| C | -1.028010 | 0.868699  | -0.861291 |
| C | -1.271476 | 1.653657  | 0.460142  |
| C | -4.070193 | 2.210587  | -0.498603 |
| O | -6.798743 | 0.960511  | -0.340036 |
| O | -6.243813 | 0.198686  | -1.446238 |
| C | -1.380511 | -1.942103 | 1.733426  |
| H | -1.294425 | -1.852514 | 2.837519  |
| O | -3.531612 | -0.112590 | -1.690464 |
| O | -1.526359 | -2.824386 | -1.608646 |
| C | 6.500754  | 2.397353  | -0.513712 |
| C | 7.521539  | 1.645261  | -0.938456 |
| O | 5.514981  | -0.244735 | 0.648229  |
| C | 6.354081  | -1.272040 | 0.385375  |
| C | 7.023598  | -1.745735 | 1.652820  |
| C | 6.697263  | 3.856198  | -0.171755 |
| O | 6.552203  | -1.733037 | -0.719453 |
| C | -8.140606 | 0.313296  | 0.047202  |
| C | -7.042898 | 2.412022  | -0.777327 |
| H | 0.518242  | -3.008866 | -0.413720 |
| H | 0.824441  | -0.006997 | 2.020461  |
| H | 1.728213  | -3.007713 | -2.504144 |
| H | 1.847776  | -1.246532 | -2.511128 |
| H | 3.995467  | -2.004836 | -1.459300 |
| H | 3.115842  | -3.163849 | -0.478346 |
| H | 3.205617  | -1.413636 | 1.120615  |
| H | 2.804004  | 0.628334  | -1.101581 |
| H | 2.112329  | 1.892927  | 0.770454  |
| H | 3.021670  | 0.911076  | 1.908598  |
| H | 5.118540  | -0.095511 | -1.384365 |
| H | 4.539906  | 2.302593  | -1.295131 |
| H | 4.904319  | 2.243764  | 1.723849  |
| H | 3.966621  | 3.394608  | 0.774631  |
| H | 7.591391  | -2.652383 | 1.447039  |
| H | 7.697789  | -0.964635 | 2.017852  |
| H | 6.281781  | -1.930202 | 2.434125  |
| H | 8.517905  | 2.068620  | -1.033151 |
| H | 7.413730  | 0.603609  | -1.219198 |
| H | 6.038757  | 4.496273  | -0.773855 |
| H | 6.456358  | 4.061992  | 0.877786  |
| H | 7.728759  | 4.170197  | -0.350347 |
| H | -1.665636 | -3.190178 | -0.716880 |
| H | -0.648170 | -1.218492 | -2.422767 |
| H | -3.334187 | -1.656651 | -0.351192 |
| H | -1.920265 | 0.857108  | 2.437132  |
| H | 0.020296  | 0.908659  | -1.166082 |
| H | -1.622961 | 1.247392  | -1.693315 |
| H | -0.328337 | 1.994088  | 0.899457  |
| H | -1.912521 | 2.522491  | 0.313304  |
| H | -4.146910 | 2.089447  | 1.496192  |
| H | -4.095716 | -0.177667 | 2.849774  |
| H | -3.791403 | -1.669901 | 1.959806  |
| H | -6.250487 | 1.436544  | 1.639873  |
| H | -6.317657 | -0.898638 | 2.090393  |
| H | -5.693992 | -1.297778 | 0.493107  |
| O | -1.609165 | -3.036856 | 1.238705  |
| H | -4.494586 | -0.275341 | -1.700198 |

|   |           |           |           |
|---|-----------|-----------|-----------|
| H | -3.889186 | 1.577908  | -1.221417 |
| H | -8.854350 | 0.404887  | -0.780309 |
| H | -8.023241 | -0.748441 | 0.274474  |
| H | -8.582735 | 0.809559  | 0.917065  |
| H | -6.839309 | 0.286311  | -2.201998 |
| H | -7.758849 | 2.439869  | -1.608683 |
| H | -7.479954 | 2.987944  | 0.045338  |
| H | -6.111592 | 2.887967  | -1.079568 |

##### 2-2 (E = -1773.686792)

|   |           |           |           |
|---|-----------|-----------|-----------|
| C | -3.483022 | -1.810661 | 0.085122  |
| C | -3.687290 | -0.401071 | -0.536265 |
| C | -5.181851 | -0.122337 | -0.273003 |
| C | -5.837297 | -1.474931 | -0.596285 |
| C | -4.883756 | -2.486333 | 0.099381  |
| C | -2.734207 | 0.718446  | -0.077055 |
| C | -1.253042 | 0.517703  | -0.416065 |
| C | -0.732960 | 1.744560  | -1.160483 |
| C | -1.736858 | 2.845477  | -0.771369 |
| C | -3.073704 | 2.097483  | -0.710002 |
| C | 0.780677  | 2.100720  | -1.005989 |
| C | 1.552146  | 0.989773  | -0.274103 |
| C | 1.008672  | -0.452135 | -0.462938 |
| C | -0.462735 | -0.516534 | -0.088054 |
| C | 1.503057  | 1.143006  | 1.272411  |
| C | 1.718800  | -0.298520 | 1.807823  |
| C | 2.037349  | -1.090834 | 0.519559  |
| C | 3.419391  | -0.621143 | -0.053491 |
| C | 3.027704  | 0.783691  | -0.689436 |
| C | 3.997951  | -1.531488 | -1.169304 |
| C | 5.493336  | -1.195653 | -1.178428 |
| C | 5.842710  | -1.258330 | 0.315141  |
| C | 4.574167  | -0.655075 | 1.029202  |
| C | 0.986327  | -1.000955 | -1.873573 |
| H | 0.806105  | -2.094725 | -1.935521 |
| H | 0.859646  | 3.018870  | -0.412152 |
| O | -5.344336 | 0.138212  | 1.151036  |
| C | -5.906640 | 1.301931  | 1.547624  |
| O | -6.259120 | 2.186955  | 0.795708  |
| C | -7.319199 | -1.656517 | -0.323409 |
| C | -7.818530 | -3.080557 | -0.405234 |
| C | -6.055626 | 1.333305  | 3.049610  |
| C | -8.161726 | -0.642352 | -0.100619 |
| H | -0.833811 | -1.388864 | 0.441212  |
| H | -1.478399 | 3.248257  | 0.217192  |
| H | -1.738615 | 3.682029  | -1.475866 |
| H | -3.447388 | 1.943408  | -1.731284 |
| H | -3.854134 | 2.630975  | -0.163816 |
| H | -2.817933 | 0.799657  | 1.016035  |
| H | -3.589014 | -0.485731 | -1.627605 |
| H | -2.752415 | -2.391167 | -0.483540 |
| H | -3.099722 | -1.721370 | 1.106637  |
| H | -5.585524 | 0.722941  | -0.829627 |
| H | -5.704779 | -1.604506 | -1.683065 |
| H | -5.214072 | -2.652029 | 1.129071  |
| H | -4.883578 | -3.457780 | -0.401896 |
| H | -6.357721 | 2.331568  | 3.364259  |
| H | -6.819822 | 0.608825  | 3.348465  |
| H | -5.121430 | 1.044863  | 3.537871  |
| H | -9.223301 | -0.826929 | 0.040204  |
| H | -7.845806 | 0.394158  | -0.064175 |
| H | -7.559234 | -3.535727 | -1.370292 |
| H | -7.368131 | -3.713203 | 0.368675  |
| H | -8.904324 | -3.127348 | -0.290793 |
| O | 1.365590  | 2.443450  | -2.260637 |
| O | 1.054694  | -0.344331 | -2.902797 |
| H | 3.080768  | 0.684059  | -1.775037 |
| O | 3.885104  | 1.869862  | -0.329422 |
| H | 1.978490  | -2.178426 | 0.637160  |
| H | 2.519521  | -0.348892 | 2.546310  |
| H | 0.809947  | -0.689335 | 2.275773  |
| H | 2.283136  | 1.831009  | 1.605502  |
| H | 0.542994  | 1.555095  | 1.593465  |
| H | 3.516629  | -1.385385 | -2.140036 |
| H | 3.865269  | -2.587744 | -0.896421 |
| H | 5.663620  | -0.180048 | -1.555778 |
| H | 6.076027  | -1.887143 | -1.793582 |
| H | 5.859369  | -2.323473 | 0.589696  |
| C | 7.222982  | -0.685658 | 0.738458  |
| O | 4.780955  | 0.574321  | 1.730565  |
| H | 4.269961  | -1.363533 | 1.807611  |
| H | -0.869007 | 1.539302  | -2.233723 |
| H | 1.326698  | 1.629709  | -2.795753 |

|   |          |           |           |
|---|----------|-----------|-----------|
| H | 3.645366 | 2.617056  | -0.896040 |
| H | 4.560345 | 1.300190  | 1.117030  |
| C | 8.342452 | -1.294491 | -0.113755 |
| O | 7.287379 | 0.722359  | 0.494284  |
| C | 7.493956 | -0.972117 | 2.228311  |
| H | 6.607287 | 1.097971  | 1.074204  |
| H | 9.310346 | -0.921761 | 0.234011  |
| H | 8.346290 | -2.387301 | -0.046152 |
| H | 8.231136 | -1.007484 | -1.162275 |
| H | 8.464774 | -0.552258 | 2.508606  |
| H | 6.728760 | -0.515821 | 2.861586  |
| H | 7.514140 | -2.049000 | 2.431265  |

|   |           |           |           |
|---|-----------|-----------|-----------|
| H | -3.733679 | -0.863793 | 2.554751  |
| H | -4.273672 | -1.958704 | 1.297438  |
| C | -7.001393 | 1.358954  | 0.066321  |
| H | -5.701856 | 0.453873  | 2.424160  |
| H | -6.398694 | -1.048954 | 1.827278  |
| H | -3.257106 | -1.558928 | -2.500405 |
| H | -4.106462 | 0.875397  | -1.844569 |
| H | -5.925123 | -0.389006 | -0.511890 |
| C | -8.327768 | 0.615860  | 0.259171  |
| C | -6.948646 | 2.588659  | 0.992421  |
| O | -7.012773 | 1.803074  | -1.295858 |
| H | -6.096546 | 2.052865  | -1.507863 |
| H | -9.156005 | 1.272595  | -0.022898 |
| H | -8.366342 | -0.269556 | -0.382791 |
| H | -8.471260 | 0.304376  | 1.298323  |
| H | -7.817000 | 3.221254  | 0.788612  |
| H | -6.966114 | 2.317133  | 2.053505  |
| H | -6.054374 | 3.191714  | 0.806503  |

**3-1 (E = -1773.691561)**

|   |           |           |           |
|---|-----------|-----------|-----------|
| C | -1.450325 | 1.500296  | 0.089302  |
| C | -2.040916 | 0.454568  | 1.059190  |
| C | -1.060365 | -0.736333 | 0.827025  |
| C | -1.352258 | -0.823691 | -0.697499 |
| C | -1.087963 | 0.640334  | -1.151401 |
| C | 0.423193  | -0.507256 | 1.072657  |
| C | 1.297649  | -1.144682 | 0.278233  |
| C | 0.837496  | -2.147442 | -0.776600 |
| C | -0.517608 | -1.852448 | -1.486502 |
| C | 2.077534  | -2.352276 | -1.662380 |
| C | 3.234227  | -2.233552 | -0.657439 |
| C | 2.825654  | -1.056203 | 0.274977  |
| C | -3.393976 | -0.103868 | 0.493428  |
| C | -2.882311 | -1.053259 | -0.665103 |
| C | -4.214362 | -0.901417 | 1.570807  |
| C | -5.637286 | -0.291734 | 1.622938  |
| C | -5.806150 | 0.387081  | 0.257872  |
| C | -4.409464 | 1.009475  | 0.062401  |
| C | 3.335523  | 0.319670  | -0.222298 |
| C | 4.865180  | 0.441367  | -0.389545 |
| C | 5.071242  | 1.957006  | -0.545973 |
| C | 4.149900  | 2.540544  | 0.557659  |
| C | 2.975309  | 1.532104  | 0.685287  |
| O | 5.495566  | 0.009854  | 0.848673  |
| C | 6.376776  | -1.015819 | 0.807519  |
| O | 6.668632  | -1.630676 | -0.196985 |
| C | 6.487938  | 2.500670  | -0.592800 |
| C | 6.607548  | 4.000597  | -0.453852 |
| O | -1.231378 | -3.060772 | -1.749129 |
| C | -1.318295 | -1.989359 | 1.638713  |
| O | -1.475834 | -3.115147 | 1.188877  |
| O | -3.536347 | -0.836422 | -1.919437 |
| O | -4.206561 | 1.612541  | -1.214199 |
| C | 7.565625  | 1.740725  | -0.814258 |
| C | 6.961644  | -1.267109 | 2.176166  |
| H | -1.267626 | -1.842103 | 2.737865  |
| H | 0.668936  | -3.090087 | -0.232641 |
| H | 0.736549  | 0.152392  | 1.877178  |
| H | 2.062333  | -3.306590 | -2.195572 |
| H | 2.138493  | -1.557062 | -2.417236 |
| H | 4.213224  | -2.101801 | -1.121279 |
| H | 3.289731  | -3.154503 | -0.064310 |
| H | 3.218923  | -1.200346 | 1.287658  |
| H | 2.916972  | 0.498782  | -1.222117 |
| H | 2.019880  | 1.974181  | 0.392445  |
| H | 2.870145  | 1.207605  | 1.725425  |
| H | 5.274127  | -0.147293 | -1.209453 |
| H | 4.608696  | 2.209215  | -1.514660 |
| H | 4.703474  | 2.599044  | 1.499808  |
| H | 3.809745  | 3.551155  | 0.317201  |
| H | 7.543988  | -2.187625 | 2.159233  |
| H | 7.610389  | -0.428604 | 2.448549  |
| H | 6.171675  | -1.328714 | 2.928854  |
| H | 8.552907  | 2.189020  | -0.885328 |
| H | 7.516276  | 0.665828  | -0.947482 |
| H | 5.989559  | 4.518026  | -1.199596 |
| H | 6.264370  | 4.345671  | 0.528584  |
| H | 7.641390  | 4.329490  | -0.585408 |
| H | -1.417121 | -3.447646 | -0.875414 |
| H | -0.312028 | -1.438641 | -2.480533 |
| H | -3.075363 | -2.086784 | -0.375631 |
| H | -2.132848 | 0.806932  | 2.092259  |
| H | -0.043372 | 0.771983  | -1.445410 |
| H | -1.707601 | 0.880251  | -2.017845 |
| H | -0.559895 | 1.959078  | 0.531196  |
| H | -2.153021 | 2.297891  | -0.151580 |
| H | -4.299230 | 1.832604  | 0.780934  |

**3-2 (E = -1773.677476)**

|   |           |           |           |
|---|-----------|-----------|-----------|
| C | 4.620951  | -0.567545 | 0.922870  |
| C | 3.421300  | -0.529674 | -0.074030 |
| C | 4.013546  | -1.454999 | -1.172713 |
| C | 5.515366  | -1.091096 | -1.283186 |
| C | 5.875882  | -0.379607 | 0.046462  |
| C | 3.034492  | 0.887661  | -0.664663 |
| C | 1.547908  | 1.051531  | -0.254991 |
| C | 1.020288  | -0.385913 | -0.507933 |
| C | 2.044605  | -1.052833 | 0.464780  |
| C | -0.453210 | -0.484796 | -0.146791 |
| C | -1.253306 | 0.558301  | -0.417301 |
| C | -0.747921 | 1.827567  | -1.095504 |
| C | 0.766729  | 2.183117  | -0.942406 |
| C | -1.755031 | 2.897624  | -0.635326 |
| C | -3.087182 | 2.138604  | -0.608480 |
| C | -2.734590 | 0.727529  | -0.059647 |
| C | 1.657862  | -0.378229 | 1.770074  |
| C | 1.505433  | 1.143119  | 1.300746  |
| C | -3.682988 | -0.371257 | -0.574767 |
| C | -3.457989 | -1.812997 | -0.038781 |
| C | -4.852849 | -2.500093 | -0.038751 |
| C | -5.823488 | -1.462904 | -0.668940 |
| C | -5.177149 | -0.122868 | -0.280710 |
| O | -5.326987 | 0.059905  | 1.156730  |
| C | -5.897844 | 1.194595  | 1.619739  |
| C | -6.030032 | 1.145847  | 3.122869  |
| C | -7.300440 | -1.673749 | -0.389069 |
| C | -8.150589 | -0.680532 | -0.108480 |
| O | 1.334264  | 2.565443  | -2.192860 |
| C | 1.015236  | -0.885689 | -1.936273 |
| O | 1.075835  | -0.195111 | -2.943083 |
| O | 3.864456  | 1.955621  | -0.236809 |
| O | 4.656512  | 0.387714  | 1.992631  |
| O | -6.269143 | 2.113411  | 0.919273  |
| C | -7.785884 | -3.097588 | -0.533354 |
| H | 0.853221  | -1.979972 | -2.035646 |
| H | 0.850435  | 3.082113  | -0.320994 |
| H | -0.818520 | -1.389066 | 0.330773  |
| H | -1.491321 | 3.244218  | 0.372976  |
| H | -1.767368 | 3.773643  | -1.290062 |
| H | -3.467057 | 2.042583  | -1.634627 |
| H | -3.866998 | 2.634159  | -0.026673 |
| H | -2.810985 | 0.744707  | 1.036847  |
| H | -3.595619 | -0.391011 | -1.670105 |
| H | -2.733272 | -2.353329 | -0.652774 |
| H | -3.056908 | -1.779652 | 0.979284  |
| H | -5.595166 | 0.746640  | -0.787161 |
| H | -5.702084 | -1.533133 | -1.762503 |
| H | -5.167148 | -2.719337 | 0.985991  |
| H | -4.852703 | -3.445477 | -0.587649 |
| H | -6.338909 | 2.122987  | 3.492478  |
| H | -6.783248 | 0.398451  | 3.391671  |
| H | -5.087341 | 0.842829  | 3.585309  |
| H | -9.208523 | -0.882859 | 0.035259  |
| H | -7.844422 | 0.356216  | -0.025451 |
| H | -7.531107 | -3.503878 | -1.521128 |
| H | -7.321466 | -3.761097 | 0.205674  |
| H | -8.869961 | -3.161467 | -0.411094 |
| H | 3.090167  | 0.822045  | -1.755252 |
| H | 2.000664  | -2.145777 | 0.530830  |
| H | 2.384334  | -0.460495 | 2.574028  |

|   |           |           |           |   |           |           |           |
|---|-----------|-----------|-----------|---|-----------|-----------|-----------|
| H | 0.710487  | -0.724607 | 2.149011  | H | 7.576375  | -0.293982 | 2.509159  |
| H | 2.328967  | 1.774849  | 1.640666  | H | 6.146473  | -1.194356 | 3.014092  |
| H | 0.568585  | 1.583153  | 1.652956  | H | 8.557131  | 2.115486  | -0.996142 |
| H | 3.498035  | -1.366865 | -2.132320 | H | 7.521948  | 0.590061  | -0.964025 |
| H | 3.907928  | -2.499013 | -0.851047 | H | 5.993054  | 4.416192  | -1.467049 |
| H | 5.699393  | -0.428250 | -2.133409 | H | 6.261228  | 4.355205  | 0.269426  |
| H | 6.116653  | -1.988936 | -1.452997 | H | 7.642892  | 4.269372  | -0.835773 |
| C | 7.219865  | -0.775123 | 0.714400  | H | -1.435454 | -3.460222 | -0.735119 |
| H | 4.621844  | -1.580059 | 1.354773  | H | -0.286131 | -1.566772 | -2.444292 |
| H | -0.896228 | 1.682013  | -2.176897 | H | -3.111665 | -2.048158 | -0.377758 |
| H | 1.309102  | 1.763680  | -2.746538 | H | -2.139930 | 0.935632  | 1.986764  |
| H | 3.654500  | 2.692304  | -0.831014 | H | 0.000749  | 0.699268  | -1.522675 |
| H | 4.205618  | 0.012289  | 2.757590  | H | -1.658203 | 0.785301  | -2.114967 |
| H | 5.939518  | 0.698316  | -0.134156 | H | -0.507559 | 1.971223  | 0.398258  |
| O | 7.453185  | 0.082244  | 1.840434  | H | -2.088884 | 2.327139  | -0.282255 |
| C | 7.260972  | -2.237190 | 1.196956  | O | -4.317292 | 2.169480  | 0.737236  |
| C | 8.383514  | -0.510588 | -0.250165 | H | -4.412419 | -0.054874 | 2.294371  |
| H | 6.582919  | 0.356169  | 2.174353  | H | -3.901364 | -1.673161 | 1.794126  |
| H | 8.246186  | -2.446750 | 1.623070  | H | -6.472506 | -0.969063 | 1.394109  |
| H | 6.523464  | -2.416959 | 1.985451  | H | -5.628003 | -1.800652 | 0.101879  |
| H | 7.081699  | -2.952975 | 0.386696  | H | -3.215757 | -1.589830 | -2.515590 |
| H | 9.330312  | -0.646491 | 0.281022  | H | -5.815957 | -0.012641 | -1.275606 |
| H | 8.369812  | -1.188668 | -1.109341 | H | -6.528096 | 2.421613  | -1.577113 |
| H | 8.346794  | 0.520600  | -0.613817 | H | -9.073913 | 1.350592  | -0.519424 |
|   |           |           |           | H | -8.065605 | 0.557458  | -1.747980 |
|   |           |           |           | H | -8.448242 | -0.288738 | -0.244595 |
|   |           |           |           | H | -8.008323 | 2.417873  | 1.487354  |
|   |           |           |           | H | -7.645555 | 0.760879  | 1.985461  |
|   |           |           |           | H | -6.353374 | 1.975906  | 1.963172  |
|   |           |           |           | H | -4.986726 | 2.780993  | 0.385350  |

#### 4-1 (E = -1773.685666)

|   |           |           |           |
|---|-----------|-----------|-----------|
| C | 2.974475  | 1.551753  | 0.594237  |
| C | 3.336962  | 0.288544  | -0.239505 |
| C | 4.867243  | 0.398702  | -0.406699 |
| C | 5.074475  | 1.902136  | -0.653530 |
| C | 4.149510  | 2.551293  | 0.410027  |
| C | 2.819510  | -1.055390 | 0.331558  |
| C | 1.291045  | -1.138988 | 0.322895  |
| C | 0.838900  | -2.188428 | -0.689213 |
| C | 2.089838  | -2.446109 | -1.545036 |
| C | 3.233089  | -2.283027 | -0.530409 |
| C | -0.505974 | -1.921636 | -1.430529 |
| C | -1.338294 | -0.843757 | -0.708195 |
| C | -1.072755 | -0.686964 | 0.814354  |
| C | 0.409704  | -0.461984 | 1.075471  |
| C | -1.047303 | 0.593410  | -1.229282 |
| C | -1.405726 | 1.515994  | -0.031794 |
| C | -2.034671 | 0.531363  | 0.977079  |
| C | -2.877004 | -1.032462 | -0.707854 |
| C | -3.378994 | -0.018106 | 0.395477  |
| C | -4.342521 | 1.060090  | -0.162029 |
| C | -5.736727 | 0.354850  | -0.246311 |
| C | -5.635040 | -0.881783 | 0.697230  |
| C | -4.291824 | -0.718104 | 1.430715  |
| C | -1.361244 | -1.893480 | 1.681163  |
| O | -1.501340 | -3.044009 | 1.290137  |
| O | -1.225310 | -3.138261 | -1.629693 |
| O | -3.478871 | -0.825030 | -1.982977 |
| C | -6.959595 | 1.289773  | -0.016028 |
| O | -6.685753 | 2.579802  | -0.635173 |
| H | -4.034626 | 1.388760  | -1.161268 |
| O | 5.492344  | 0.042660  | 0.858273  |
| C | 6.374016  | -0.982502 | 0.883184  |
| C | 6.945684  | -1.155835 | 2.269539  |
| C | 6.490867  | 2.442512  | -0.730370 |
| C | 7.570057  | 1.671323  | -0.899795 |
| O | 6.675615  | -1.653491 | -0.081893 |
| C | 6.608815  | 3.948333  | -0.687442 |
| C | -8.213013 | 0.692400  | -0.669779 |
| C | -7.251443 | 1.628814  | 1.451519  |
| H | -1.356232 | -1.684641 | 2.771855  |
| H | 0.655768  | -3.102021 | -0.102643 |
| H | 0.715441  | 0.233270  | 1.852773  |
| H | 2.075748  | -3.426805 | -2.028218 |
| H | 2.168001  | -1.691854 | -2.339390 |
| H | 4.219999  | -2.182933 | -0.985632 |
| H | 3.271484  | -3.171615 | 0.111479  |
| H | 3.203064  | -1.143190 | 1.354463  |
| H | 2.924717  | 0.411420  | -1.250473 |
| H | 2.019543  | 1.975304  | 0.274040  |
| H | 2.866355  | 1.288712  | 1.651183  |
| H | 5.279997  | -0.238469 | -1.187554 |
| H | 4.614591  | 2.095002  | -1.637057 |
| H | 4.699819  | 2.666631  | 1.348884  |
| H | 3.810127  | 3.545524  | 0.107890  |
| H | 7.542502  | -2.066477 | 2.305338  |

#### 4-2 (E = -1773.679401)

|   |           |           |           |
|---|-----------|-----------|-----------|
| C | -5.177221 | -0.087324 | -0.292402 |
| C | -3.679156 | -0.311401 | -0.586214 |
| C | -3.453712 | -1.783158 | -0.139659 |
| C | -4.845154 | -2.474232 | -0.199431 |
| C | -5.813702 | -1.430236 | -0.772021 |
| C | -2.739542 | 0.756136  | 0.005084  |
| C | -1.255775 | 0.614302  | -0.354951 |
| C | -0.747844 | 1.928472  | -0.939825 |
| C | -1.765241 | 2.961702  | -0.421813 |
| C | -3.093817 | 2.197140  | -0.457423 |
| C | 0.762021  | 2.280387  | -0.737210 |
| C | 1.546392  | 1.095961  | -0.146327 |
| C | 1.016930  | -0.315945 | -0.515897 |
| C | -0.454004 | -0.443427 | -0.156312 |
| C | 2.049327  | -1.064730 | 0.381729  |
| C | 3.416798  | -0.514252 | -0.147320 |
| C | 3.032441  | 0.964086  | -0.565695 |
| C | 3.991261  | -1.337328 | -1.356995 |
| C | 5.534361  | -1.423452 | -1.166246 |
| C | 5.833307  | -0.447369 | -0.009564 |
| C | 4.582548  | -0.577429 | 0.882236  |
| C | 1.727681  | -0.441544 | 1.757017  |
| C | 1.497472  | 1.054446  | 1.408349  |
| H | 4.539023  | 0.218315  | 1.623342  |
| C | 7.223190  | -0.501066 | 0.673447  |
| C | 8.317618  | -0.129204 | -0.343434 |
| O | 3.877745  | 1.951624  | 0.022763  |
| C | 1.015005  | -0.688959 | -1.982557 |
| O | 1.113507  | 0.082230  | -2.926129 |
| O | 1.337540  | 2.783859  | -1.940543 |
| C | -7.292391 | -1.635901 | -0.520988 |
| C | -7.770359 | -3.050120 | -0.755709 |
| O | -5.343398 | 0.002565  | 1.151953  |
| C | -5.921221 | 1.104403  | 1.680510  |
| O | -6.287254 | 2.065661  | 1.036316  |
| C | -6.067309 | 0.959591  | 3.176131  |
| C | -8.149657 | -0.664920 | -0.188800 |
| O | 7.235920  | 0.461607  | 1.743598  |
| C | 7.567869  | -1.832958 | 1.347556  |
| H | 0.825955  | -1.765777 | -2.178176 |
| H | 0.828591  | 3.118921  | -0.033955 |
| H | -0.815257 | -1.377324 | 0.263372  |
| H | -1.513291 | 3.241261  | 0.610067  |
| H | -1.775267 | 3.879104  | -1.017278 |
| H | -3.462390 | 2.164018  | -1.491723 |
| H | -3.882093 | 2.651956  | 0.146044  |
| H | -2.823784 | 0.703988  | 1.099954  |
| H | -3.581602 | -0.261435 | -1.679893 |
| H | -2.719699 | -2.280856 | -0.778061 |



|   |           |           |           |
|---|-----------|-----------|-----------|
| H | -3.063742 | -1.811625 | 0.882722  |
| H | -5.593364 | 0.811378  | -0.746821 |
| H | -5.680580 | -1.401824 | -1.866441 |
| H | -5.169395 | -2.760917 | 0.805355  |
| H | -4.834721 | -3.382030 | -0.808432 |
| H | -6.395096 | 1.906802  | 3.602891  |
| H | -6.810000 | 0.184556  | 3.390166  |
| H | -5.123804 | 0.643485  | 3.628218  |
| H | -9.208001 | -0.879720 | -0.067897 |
| H | -7.848656 | 0.365863  | -0.039048 |
| H | -7.504918 | -3.395692 | -1.763656 |
| H | -7.310081 | -3.755324 | -0.053643 |
| H | -8.855257 | -3.125099 | -0.647688 |
| H | 3.104903  | 1.055120  | -1.651899 |
| H | 1.991820  | -2.156855 | 0.368874  |
| H | 2.526594  | -0.611057 | 2.478185  |
| H | 0.819254  | -0.893265 | 2.168465  |
| H | 2.272911  | 1.710079  | 1.811400  |
| H | 0.534325  | 1.412419  | 1.781829  |
| H | 3.742736  | -0.867969 | -2.312269 |
| H | 3.549915  | -2.340682 | -1.386931 |
| H | 6.076735  | -1.167659 | -2.080194 |
| H | 5.837640  | -2.446016 | -0.908295 |
| O | 4.530461  | -1.794144 | 1.637923  |
| H | -0.877949 | 1.855772  | -2.030823 |
| H | 1.324859  | 2.037018  | -2.566314 |
| H | 3.663576  | 2.779125  | -0.431524 |
| H | 5.756981  | 0.566460  | -0.426736 |
| H | 6.954037  | 1.310213  | 1.373566  |
| H | 8.554992  | -1.754321 | 1.812656  |
| H | 6.833367  | -2.071148 | 2.116642  |
| H | 7.603395  | -2.649540 | 0.619243  |
| H | 9.282779  | -0.056989 | 0.166099  |
| H | 8.405263  | -0.872747 | -1.142620 |
| H | 8.105994  | 0.840400  | -0.810476 |
| H | 4.668411  | -2.535020 | 1.033058  |

**5-1 (E = -1773.683527)**

|   |           |           |           |
|---|-----------|-----------|-----------|
| C | -1.311226 | 1.643896  | 0.273794  |
| C | -1.947126 | 0.631351  | 1.255987  |
| C | -1.089454 | -0.631865 | 0.949667  |
| C | -1.437860 | -0.655769 | -0.568368 |
| C | -1.017443 | 0.784149  | -0.987930 |
| C | 0.415794  | -0.505720 | 1.150634  |
| C | 1.224959  | -1.145982 | 0.293528  |
| C | 0.675465  | -2.082351 | -0.776450 |
| C | -0.728312 | -1.754004 | -1.387487 |
| C | 1.854949  | -2.272716 | -1.744017 |
| C | 3.070825  | -2.244880 | -0.803093 |
| C | 2.754214  | -1.111950 | 0.215492  |
| C | -3.355724 | 0.200018  | 0.745692  |
| C | -2.989399 | -0.669882 | -0.551553 |
| C | -4.171714 | -0.629422 | 1.768753  |
| C | -5.596561 | -0.621940 | 1.205067  |
| C | -5.784110 | 0.815716  | 0.664856  |
| C | -4.333587 | 1.362858  | 0.426111  |
| C | 3.289791  | 0.270950  | -0.232621 |
| C | 4.811241  | 0.350197  | -0.480944 |
| C | 5.062852  | 1.864586  | -0.570816 |
| C | 4.224610  | 2.419903  | 0.611216  |
| C | 3.026679  | 1.442143  | 0.757770  |
| O | 5.493250  | -0.169419 | 0.695225  |
| C | 6.340091  | -1.213207 | 0.549223  |
| O | 6.571962  | -1.769352 | -0.504090 |
| C | 6.491967  | 2.366458  | -0.670759 |
| C | 6.667700  | 3.853145  | -0.464646 |
| O | -1.487128 | -2.946708 | -1.524825 |
| C | -1.392616 | -1.868246 | 1.764283  |
| O | -1.599737 | -2.993401 | 1.331906  |
| O | -3.467609 | -0.173173 | -1.785784 |
| H | -4.185256 | 1.695420  | -0.604839 |
| C | -6.773942 | 0.933280  | -0.516096 |
| C | -6.882222 | 2.376551  | -1.031822 |
| O | -6.254752 | 0.086973  | -1.570029 |
| C | -8.164521 | 0.415175  | -0.117806 |
| C | 7.531285  | 1.587735  | -0.989063 |
| C | 6.972103  | -1.571094 | 1.872839  |
| H | -1.326764 | -1.712571 | 2.862556  |
| H | 0.526235  | -3.046497 | -0.266216 |
| H | 0.790926  | 0.105539  | 1.967056  |
| H | 1.777740  | -3.196108 | -2.324566 |
| H | 1.897763  | -1.440328 | -2.459215 |
| H | 4.026123  | -2.115692 | -1.315219 |

|   |           |           |            |
|---|-----------|-----------|------------|
| H | 3.128868  | -3.199829 | -0.266581  |
| H | 3.194441  | -1.327571 | 1.195968   |
| H | 2.824294  | 0.520215  | -1.195901  |
| H | 2.070517  | 1.927574  | 0.549122   |
| H | 2.973599  | 1.063645  | 1.783411   |
| H | 5.152775  | -0.206535 | -1.352327  |
| H | 4.556578  | 2.181938  | -1.497542  |
| H | 4.831772  | 2.415719  | 1.521787   |
| H | 3.905210  | 3.451150  | 0.438870   |
| H | 7.546627  | -2.490295 | 1.764334   |
| H | 7.634461  | -0.758616 | 2.187599   |
| H | 6.207533  | -1.688953 | 2.645016   |
| H | 8.527072  | 2.010487  | -1.092555  |
| H | 7.440070  | 0.523046  | -1.172103  |
| H | 6.024975  | 4.426086  | -1.146220  |
| H | 6.391735  | 4.156601  | 0.552152   |
| H | 7.702429  | 4.158532  | -0.639694  |
| H | -1.650733 | -3.255389 | -0.615882  |
| H | -0.598368 | -1.385413 | -2.4111038 |
| H | -3.343534 | -1.696734 | -0.405593  |
| H | -1.952981 | 0.970778  | 2.295551   |
| H | 0.040583  | 0.816994  | -1.258841  |
| H | -1.595581 | 1.094695  | -1.858469  |
| H | -0.389206 | 2.049568  | 0.703293   |
| H | -1.972803 | 2.489466  | 0.086129   |
| O | -4.060046 | 2.439507  | 1.338271   |
| H | -4.149818 | -0.121681 | 2.741644   |
| H | -3.803359 | -1.646973 | 1.916009   |
| H | -6.195214 | 1.436201  | 1.470427   |
| H | -6.346413 | -0.892957 | 1.954340   |
| H | -5.680434 | -1.344132 | 0.385887   |
| H | -4.438529 | -0.241069 | -1.799066  |
| H | -8.857862 | 0.488738  | -0.964304  |
| H | -8.118304 | -0.631319 | 0.191248   |
| H | -8.584475 | 1.003034  | 0.704661   |
| H | -6.837250 | 0.155446  | -2.338054  |
| H | -7.598320 | 2.436418  | -1.860061  |
| H | -7.240636 | 3.049025  | -0.245075  |
| H | -5.920036 | 2.743683  | -1.397842  |
| H | -4.586227 | 3.198765  | 1.056107   |

**5-2 (E = -1773.688368)**

|   |           |           |           |
|---|-----------|-----------|-----------|
| C | 4.592202  | -0.780871 | 1.136048  |
| C | 3.418809  | -0.804300 | 0.113743  |
| C | 3.960274  | -1.790189 | -0.952727 |
| C | 5.433552  | -1.397970 | -1.105818 |
| C | 5.903747  | -1.096746 | 0.336093  |
| C | 3.108543  | 0.609474  | -0.527945 |
| C | 1.625953  | 0.871624  | -0.167897 |
| C | 1.037089  | -0.555513 | -0.324659 |
| C | 2.021755  | -1.203000 | 0.698605  |
| C | -0.443319 | -0.559352 | 0.021243  |
| C | -1.191583 | 0.488610  | -0.357195 |
| C | -0.614458 | 1.675759  | -1.122209 |
| C | 0.907645  | 1.986018  | -0.948391 |
| C | -1.586874 | 2.819976  | -0.781201 |
| C | -2.950400 | 2.120403  | -0.734386 |
| C | -2.674766 | 0.743114  | -0.066577 |
| C | 1.712088  | -0.357038 | 1.953103  |
| C | 1.546872  | 1.073672  | 1.372500  |
| C | -3.646516 | -0.353659 | -0.541919 |
| C | -3.511302 | -1.759125 | 0.106161  |
| C | -4.931305 | -2.392496 | 0.068462  |
| C | -5.825817 | -1.358481 | -0.671548 |
| C | -5.139912 | -0.023911 | -0.337344 |
| O | -5.345748 | 0.256684  | 1.077621  |
| C | -5.881384 | 1.442396  | 1.443321  |
| C | -6.080149 | 1.494109  | 2.939088  |
| C | -7.321334 | -1.491774 | -0.452261 |
| C | -8.139130 | -0.451532 | -0.259214 |
| O | 1.523806  | 2.273195  | -2.200862 |
| C | 1.020870  | -1.140451 | -1.720327 |
| O | 1.135788  | -0.515617 | -2.765351 |
| O | 3.975188  | 1.658584  | -0.070984 |
| C | 7.058736  | -0.057399 | 0.427568  |
| C | 7.397748  | 0.271694  | 1.895244  |
| H | 4.639030  | 0.185373  | 1.647354  |
| O | -6.178216 | 2.330930  | 0.671686  |
| C | -7.863003 | -2.899359 | -0.551807 |
| C | 8.312518  | -0.609480 | -0.265660 |
| O | 6.745395  | 1.145527  | -0.272475 |
| H | 0.797728  | -2.227456 | -1.756671 |
| H | 1.005020  | 2.918152  | -0.379285 |

|   |           |           |           |
|---|-----------|-----------|-----------|
| H | -0.855396 | -1.402499 | 0.567477  |
| H | -1.335988 | 3.235963  | 0.203876  |
| H | -1.543203 | 3.639490  | -1.504196 |
| H | -3.305966 | 1.958836  | -1.760978 |
| H | -3.723636 | 2.692326  | -0.217432 |
| H | -2.792412 | 0.844726  | 1.021597  |
| H | -3.512009 | -0.458515 | -1.627688 |
| H | -2.774189 | -2.368969 | -0.421857 |
| H | -3.169719 | -1.665744 | 1.142009  |
| H | -5.495488 | 0.827817  | -0.916323 |
| H | -5.657350 | -1.503440 | -1.751354 |
| H | -5.307429 | -2.540469 | 1.085022  |
| H | -4.940586 | -3.367149 | -0.426449 |
| H | -6.364628 | 2.503601  | 3.233700  |
| H | -6.873254 | 0.793601  | 3.219088  |
| H | -5.170947 | 1.185623  | 3.461225  |
| H | -9.210283 | -0.603039 | -0.156150 |
| H | -7.792963 | 0.574821  | -0.212139 |
| H | -7.586294 | -3.362743 | -1.508116 |
| H | -7.459530 | -3.546316 | 0.236068  |
| H | -8.952984 | -2.911030 | -0.473925 |
| H | 3.216289  | 0.535942  | -1.612522 |
| H | 1.920116  | -2.279699 | 0.854042  |
| H | 2.499411  | -0.444730 | 2.700300  |
| H | 0.782501  | -0.702681 | 2.416679  |
| H | 2.334807  | 1.759240  | 1.692989  |
| H | 0.589408  | 1.517284  | 1.657525  |
| H | 3.421289  | -1.758956 | -1.903620 |
| H | 3.882025  | -2.810449 | -0.557416 |
| H | 5.532263  | -0.490695 | -1.711745 |
| H | 6.026267  | -2.178789 | -1.590728 |
| H | 6.284561  | -2.027471 | 0.775861  |
| O | 4.336848  | -1.819721 | 2.096029  |
| H | -0.737364 | 1.446978  | -2.192193 |
| H | 1.471562  | 1.443857  | -2.710129 |
| H | 3.803829  | 2.411271  | -0.656841 |
| H | 5.825398  | 1.396086  | -0.071685 |
| H | 9.107977  | 0.140661  | -0.231808 |
| H | 8.671690  | -1.519991 | 0.224987  |
| H | 8.109327  | -0.833053 | -1.315796 |
| H | 8.245610  | 0.961785  | 1.928243  |
| H | 6.560619  | 0.759504  | 2.404393  |
| H | 7.669099  | -0.628058 | 2.461483  |
| H | 5.078427  | -1.822905 | 2.715249  |
